# Supplementary material for: LINC00312/YBX1 Axis Regulates Myofibroblast Activities in Oral Submucous Fibrosis
Source: MDPI journal article supplement (doi:10.3390/ijms21082979), 2020-04-23
Supplement: s1 [file s1]

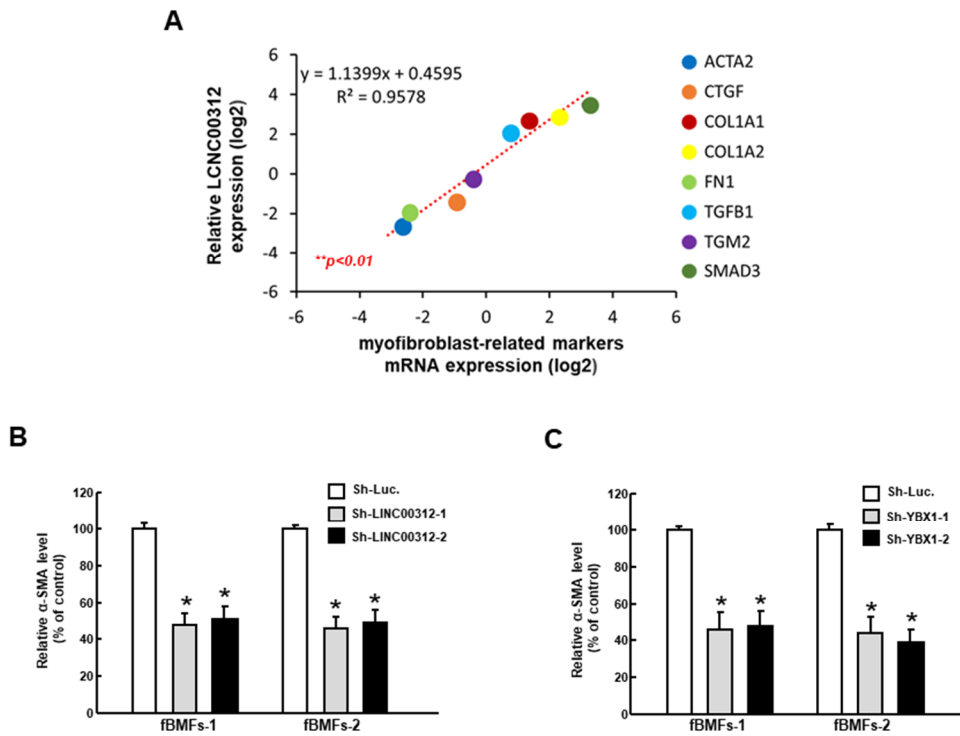

**Supplementary Figure S1.** (A) LINC00312 is positively correlated with myofibroblasts markers by Pearson correlation analysis. Levels of  $\alpha$ -SMA expressions in fBMFs with LINC00312 (B) or YBX-1 (C) knockdown were examined by western blotting and measured by densitometer. The relative level of indicated protein expression was normalized against GAPDH and the control was set as 100%. Optical density values represent the mean  $\pm$  SD. Data shown here are the mean  $\pm$  SD of three independent experiments. \*  $p < 0.05$  compared to Sh-Luc. group.
